# Supplementary material
Source: Springer Nature journal article supplement (http://www.springermedizin.de/resource/supplementary/12993_2012_447_MOESM2_ESM.pdf/9617804)

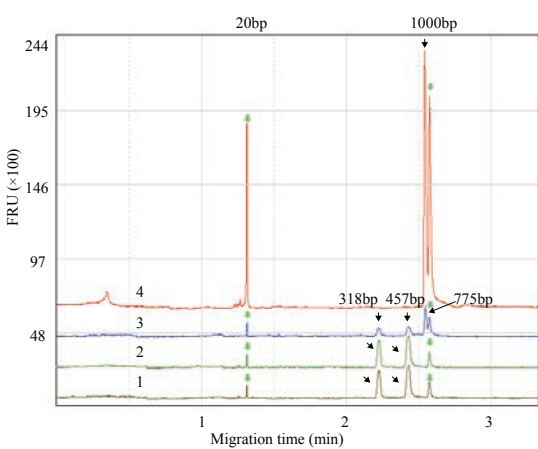

**a**

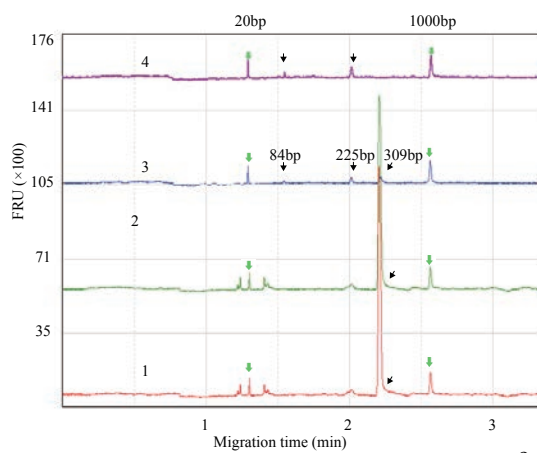

**c**

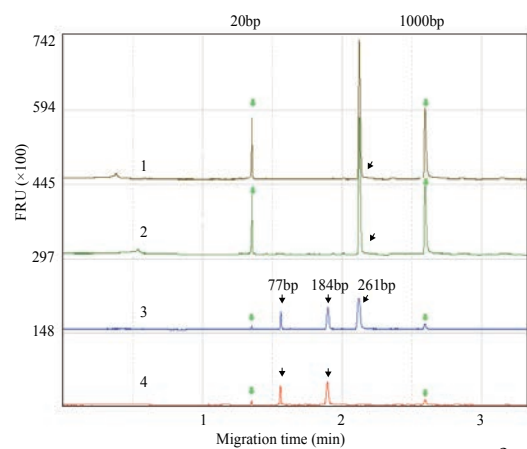

**e**

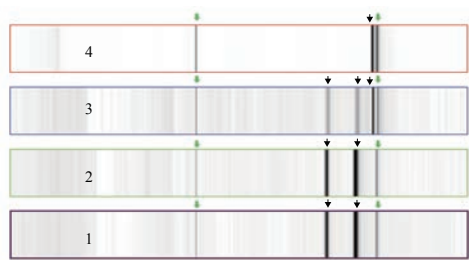

IVS9

**b**

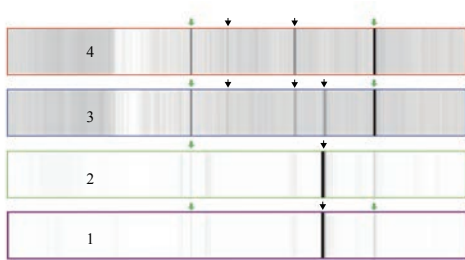

P268S

**d**

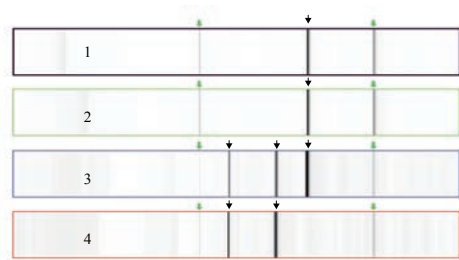

G2385R

**f**

Supplement: MOESM2 [file 9617804]
